# Intensive COVID-19 testing associated with reduced mortality - an ecological analysis of 108 countries

Chris Kenyon<sup>1,2\*</sup>

<sup>1</sup>*HIV/STI Unit, Institute of Tropical Medicine, Antwerp, Belgium;* <sup>2</sup>*Division of Infectious Diseases and HIV Medicine, University of Cape Town, Anzio Road, Observatory 7700, South Africa;*

\*Corresponding author. HIV/STI Unit, Institute of Tropical Medicine, Antwerp, 2000, Belgium. Tel: +32 3 2480796; Fax: +32 3 2480831; E-mail: ckenyon@itg.be

**Keywords:** SARS CoV-2; COVID-19 mortality rate; testing intensity; epidemiology

## 34 **Abstract**

35

## 36 **Background**

37 Intensive screening and testing for COVID-19 could facilitate early detection and  
38 isolation of infected persons and thereby control the size of the epidemic. It could  
39 also facilitate earlier and more targeted therapy. These factors could plausibly  
40 reduce attributable mortality which was the hypothesis tested in this study.

41

## 42 **Methods**

43 Linear regression was used to assess the country-level association between COVID-  
44 19 attributable mortality per 100 000 inhabitants (mortality/capita) and COVID-19  
45 tests/capita (number of tests/100 000 inhabitants) controlling for the cumulative  
46 number of COVID-19 infections/100 000 inhabitants (cases/capita), the age of the  
47 epidemic (number of days between first case reported and 8 April), national health  
48 expenditure per capita and WHO world region.

49

## 50 **Results**

51 The COVID-19 mortality rate varied between 0.3 and 3110 deaths/100 000  
52 inhabitants (median 30, IQR 8-105). The intensity of testing per 100 000 also varied  
53 considerably (median 21,970, IQR 2,735-89,095) as did the number of COVID-19  
54 cases per 100 000 (median 1,600, IQR 340-4,760 cases/100 000). In the multivariate  
55 model, the COVID-19 mortality rate was negatively associated with tests/capita  
56 (Coef. -0.036, 95% CI -0.047- -0.025) and positively associated with cases/capita  
57 (Coef. 0.093, 95% CI 0.819- 1.034).

58

59

60

61 **Conclusions**

62 The results are compatible with the hypothesis that intensive testing and isolation  
63 could play a role in reducing COVID-10 mortality rates.

64

## 65     **Background**

66  
67     It is important to understand the determinants of national variations in COVID-19-  
68     related mortality [1-4]. We aimed to evaluate if testing intensity plays a role. An  
69     obvious determinant of COVID-19 attributable mortality is the size of the national  
70     epidemic [2, 5, 6]. The measured extent of spread is however heavily dependent on  
71     the age of the epidemic and national testing policies [5, 6]. Because a majority of  
72     infections are pauci- or a-symptomatic a country that tests less intensively will tend  
73     to have a falsely low measured incidence and a correspondingly higher case fatality  
74     rate as fewer pauci-symptomatic infections are included in the denominator [5, 7].  
75     Intensive screening and testing could however facilitate early detection and isolation  
76     of infected persons and thereby control the size of the epidemic [6, 8]. It could also  
77     facilitate earlier and more targeted therapy [8]. These factors could plausibly reduce  
78     attributable mortality [6].

79  
80     We tested this hypothesis by using linear regression to assess the country-level  
81     association between COVID-19 attributable mortality per 100 000 inhabitants  
82     (mortality/capita) and COVID-19 tests/capita (number of tests/100 000 inhabitants)  
83     controlling for the cumulative number of COVID-19 infections/100 000 inhabitants  
84     (cases/capita), the age of the epidemic (number of days between first case reported  
85     and 8 April), national health expenditure per capita and WHO world region.

## 87     **Methods**

### 88     ***Dependent variable:***

89 Mortality/capita. The COVID-19 attributable mortality per 100 000 inhabitants. This  
90 data was obtained from the World of Meters data repository on 8 April 2020:  
91 <https://www.worldometers.info/coronavirus/>

92

93 ***Independent variables:***

94 *Cases/capita*. The cumulative number of cases of COVID-19 infection per 100 000  
95 inhabitants on 8 April 2020 per country. This data was obtained from the World of  
96 Meters data repository on 8 April 2020: <https://www.worldometers.info/coronavirus/>  
97

98 *Tests/capita*. Cumulative number of nucleic acid amplification SARS CoV-2 tests  
99 conducted per country per 100 000 inhabitants up till 8 April 2020. This data was  
100 obtained from the World of Meters data repository on 8 April 2020:  
101 <https://www.worldometers.info/coronavirus/>  
102

103 *Age of epidemic*. The date the first case of COVID-19 was diagnosed in each  
104 country. This was measured in days after the first COVID-19 case was officially  
105 reported in China (10 January 2020). This data was obtained from the ECDC data  
106 repository on 8 April 2020: [https://www.ecdc.europa.eu/en/geographical-distribution-](https://www.ecdc.europa.eu/en/geographical-distribution-2019-ncov-cases)  
107 [2019-ncov-cases](https://www.ecdc.europa.eu/en/geographical-distribution-2019-ncov-cases)

108

109 *Health expenditure per capita*. Current expenditures on health per capita in current  
110 US dollars for the year 2016. Estimates of current health expenditures include  
111 healthcare goods and services consumed during each year. This data was taken  
112 from the World Bank's Data Catalogue: [https://datacatalog.worldbank.org/current-](https://datacatalog.worldbank.org/current-health-expenditure-capita-current-us)  
113 [health-expenditure-capita-current-us](https://datacatalog.worldbank.org/current-health-expenditure-capita-current-us)

114

115 *WHO regions.* Countries were categorized according to WHO region:

116 [https://www.who.int/choice/demography/by\\_country/en/](https://www.who.int/choice/demography/by_country/en/)

117

## 118 ***Data analysis***

119 A correlation matrix was performed to investigate the relationships between case  
120 fatality rate and the independent variables (Table 1). Linear regression was then  
121 used to analyze the association between the COVID-19 mortality rate/100 000  
122 inhabitants and COVID-19 tests/capita (number of tests/100 000 inhabitants)  
123 controlling for the cumulative number of COVID-19 infections/100 000 inhabitants  
124 (cases/capita), the age of the epidemic (number of days between first case reported  
125 and 8 April), national health expenditure per capita and WHO world region. The most  
126 recent data available as of 8 April 2020 was used for all variables. Sensitivity  
127 analyses were conducted limiting the analysis to countries whose epidemics were  
128 older than 15 March 2020. A p-value of < 0.01 was considered statistically  
129 significant. The analyses were performed in STATA version 16 (Stata Corp, College  
130 Station, Tx).

131

## 132 **Results**

133 Complete data was available for 108 countries. The COVID-19 mortality rate varied  
134 between 0.3 and 3110 deaths/100 000 inhabitants (median 30, IQR 8-105; Table 3).  
135 The intensity of testing per 100 000 also varied considerably (median 21,970, IQR  
136 2,735-89,095) as did the number of COVID-19 cases per 100 000 (median 1,600,  
137 IQR 340-4,760 cases/100 000)

138

Pearson's correlation revealed deaths/capita to be positively correlated with cases/capita ( $r=0.80$ ,  $P<0.001$ ), which was in turn positively correlated with tests/capita ( $r=0.55$ ,  $P<0.001$ ), and health care expenditure ( $r=0.51$ ,  $P<0.001$ ; Table 1). Tests/capita was positively correlated with health care expenditure ( $r=0.45$ ,  $P<0.001$ ).

In the multivariate model, the COVID-19 mortality rate was negatively associated with tests/capita (Coef.  $-0.036$ , 95% CI  $-0.047$ -  $-0.025$ ) and positively associated with cases/capita (Coef.  $0.093$ , 95% CI  $0.819$ -  $1.034$ ; Table 2). Sensitivity analyses limited to countries with epidemics older than 15 March 2020 made little difference to the findings (Table 4).

## Conclusion

Our analysis confirms the logical association between increased testing intensity and increased detection of cases/capita as well the association between cases/capita and deaths/capita. The key finding was that on multivariate analysis, testing intensity was negatively associated with mortality/capita. This is compatible with the theory that intensive testing is associated with reduced mortality via reducing the spread of SARS-CoV-2 and/or facilitating earlier more appropriate treatment of infected persons [6, 8]. Our study design does not allow us to exclude the possibility that this association is due to residual confounding. Possible confounders include other components of a successful national COVID-19 containment strategy such as contact tracing or social distancing [2, 5]. These may be associated with both increased testing intensity and reduced transmission/deaths. In addition, we did not

control for other variables such as national age structure and prevalence of  
comorbidities which may have influenced mortality [9].

These limitations notwithstanding, our analysis provides additional evidence to  
promote calls to intensify national COVID-19 testing to not only control the spread of  
this disease but also to reduce associated mortality.



175 **Authors' contributions**

176 CK conceptualized the study, was responsible for the acquisition, analysis and  
177 interpretation of data and wrote the analysis up as a manuscript.

178

179 **Funding**

180 Nil

181

182 **Conflict of interest**

183 The author declares that he/she has no competing interests.

184

185 **Ethical approval**

186 The analysis involved a secondary analysis of public access ecological level data. As  
187 a result, no ethics approval was necessary.

188

189 **Informed consent**

190 Not applicable

191 **Acknowledgements**

192 Nil

193

**Table 1. Correlation coefficients (r-values) for relations between COVID-19 mortality rate/100 000 inhabitants, cumulative number of cases of COVID-19/100 000, testing rate/100 000, age of the COVID-19 epidemic and health expenditure per capita (\* P<0.001)**

|                    | Mortality | Cumulative Cases | Testing Intensity | Age of Epidemic | Health Expenditure |
|--------------------|-----------|------------------|-------------------|-----------------|--------------------|
| Mortality Rate     | 1         |                  |                   |                 |                    |
| Cumulative Cases   | 0.80*     | 1                |                   |                 |                    |
| Testing Intensity  | 0.17      | 0.55*            | 1                 |                 |                    |
| Age of Epidemic    | -0.14     | -0.13            | -0.16             | 1               |                    |
| Health Expenditure | 0.27      | 0.51*            | 0.45*             | -0.43*          | 1                  |

**Table 2. Country level, multivariate linear regression of factors associated with COVID-19 mortality rate per 100 000 inhabitants**

|                       | Coef. (95% Confidence Interval) | P-Value |
|-----------------------|---------------------------------|---------|
| N                     | 108                             |         |
| Tests/capita          | -0.036 (-0.005- -0.002)         | <0.001  |
| Cases/capita          | 0.093 (0.082- 0.103)            | <0.001  |
| Age of Epidemic       | -0.092 (-0.172- -0.011)         | 0.026   |
| Health Expenditure    | -0.0009 (-0.0016- -0.0002)      | 0.011   |
| Region                |                                 |         |
| Europe                | Ref                             |         |
| Africa                | 0.154 (-3.725-4.034)            | 0.937   |
| Americas              | 0.047 (-2.849-2.944)            | 0.974   |
| Eastern Mediterranean | 0.986 (-2.720-4.692)            | 0.599   |
| South East Asia       | -2.072 (-7.047-2.903)           | 0.411   |
| Western Pacific       | 0.094 (-4.461-4.651)            | 0.967   |

**Table 3. COVID-19 mortality rate/100 000 inhabitants, cumulative number of cases of COVID-19/100 000 (Cases/capita), number tested for COVID-19/100 000 (Tests/capita), date first COVID-19 case reported (Age Epi.) and health expenditure (Health Exp – in US\$) in 108 countries.**

| Country                | Mortality | Cases/capita | Tests/Capita | Age Epi.  | Health Exp. |
|------------------------|-----------|--------------|--------------|-----------|-------------|
| Albania                | 0.8       | 13.9         | 103.9        | 07-Mar-20 | 272         |
| Algeria                | 0.4       | 3.3          | 7.7          | 24-Feb-20 | 260         |
| Andorra                | 29.8      | 730          | 2165.3       | 01-Mar-20 | 3835        |
| Antigua and Barbuda    | 2         | 19.4         | 40.8         | 12-Mar-20 | 623         |
| Argentina              | 0.1       | 3.8          | 26.1         | 02-Mar-20 | 955         |
| Armenia                | 0.3       | 29.7         | 184          | 29-Feb-20 | 359         |
| Australia              | 0.2       | 23.6         | 1252.4       | 24-Jan-20 | 5002        |
| Austria                | 3         | 143.2        | 1340.8       | 24-Feb-20 | 4688        |
| Azerbaijan             | 0.08      | 8.1          | 525.7        | 27-Feb-20 | 268         |
| Bahrain                | 0.3       | 48.2         | 3076.6       | 23-Feb-20 | 1099        |
| Bangladesh             | 0.01      | 0.1          | 2.6          | 07-Mar-20 | 34          |
| Barbados               | 1         | 21.9         | 193.8        | 16-Mar-20 | 1164        |
| Belarus                | 0.1       | 11.3         | 486.8        | 27-Feb-20 | 318         |
| Belgium                | 19.3      | 201.9        | 726.9        | 03-Feb-20 | 4149        |
| Belize                 | 0.3       | 2            | 67.4         | 22-Mar-20 | 304         |
| Bolivia                | 0.1       | 1.8          | 5.1          | 09-Mar-20 | 213         |
| Bosnia and Herzegovina | 1         | 24.5         | 210.6        | 04-Mar-20 | 444         |
| Brazil                 | 0.3       | 6.7          | 25.8         | 24-Feb-20 | 1016        |
| Brunei                 | 0.2       | 30.9         | 2021.8       | 08-Mar-20 | 630         |
| Bulgaria               | 0.3       | 8.5          | 228.8        | 06-Mar-20 | 612         |
| Canada                 | 1         | 48.9         | 922.3        | 24-Jan-20 | 4458        |
| Chile                  | 0.3       | 29           | 315.9        | 02-Mar-20 | 1191        |
| Colombia               | 0.1       | 3.5          | 59.8         | 05-Mar-20 | 340         |
| Costa Rica             | 0.04      | 9.5          | 108.5        | 04-Mar-20 | 889         |
| Croatia                | 0.5       | 32.7         | 319.7        | 24-Feb-20 | 884         |
| Cuba                   | 0.1       | 3.5          | 62.3         | 10-Mar-20 | 971         |
| Cyprus                 | 0.7       | 43.6         | 1182.2       | 08-Mar-20 | 1634        |
| Czechia                | 0.8       | 47           | 921.5        | 29-Feb-20 | 1321        |
| Denmark                | 3.8       | 93           | 1008.6       | 26-Feb-20 | 5566        |
| Dominican Republic     | 1         | 19.5         | 41.9         | 29-Feb-20 | 414         |
| Ecuador                | 1.2       | 22.6         | 81.7         | 28-Feb-20 | 505         |
| Egypt                  | 0.09      | 1.4          | 24.4         | 13-Feb-20 | 131         |
| Estonia                | 1.8       | 89.3         | 1870.5       | 26-Feb-20 | 1185        |
| Ethiopia               | 0.002     | 0.05         | 2.2          | 12-Mar-20 | 28          |
| Finland                | 0.7       | 44.9         | 658.8        | 28-Jan-20 | 4117        |
| France                 | 15.8      | 167.1        | 343.6        | 23-Jan-20 | 4263        |
| Georgia                | 0.08      | 5.2          | 69.2         | 25-Feb-20 | 308         |

|                 |       |       |        |           |      |
|-----------------|-------|-------|--------|-----------|------|
| Germany         | 2.5   | 130.5 | 1096.2 | 26-Jan-20 | 4714 |
| Greece          | 0.8   | 18.1  | 274.2  | 25-Feb-20 | 1511 |
| Guatemala       | 0.02  | 0.5   | 6.3    | 12-Mar-20 | 241  |
| Guyana          | 0.6   | 4.2   | 16.8   | 11-Mar-20 | 192  |
| Haiti           | 0.009 | 0.2   | 2.3    | 19-Mar-20 | 38   |
| Hungary         | 0.6   | 9.3   | 266.5  | 03-Mar-20 | 943  |
| Iceland         | 1.8   | 473.6 | 9068.9 | 27-Feb-20 | 5064 |
| India           | 0.01  | 0.4   | 10.2   | 29-Jan-20 | 63   |
| Indonesia       | 0.09  | 1.1   | 5.2    | 01-Mar-20 | 112  |
| Iran            | 4.8   | 76.9  | 251.4  | 18-Feb-20 | 415  |
| Iraq            | 0.2   | 3     | 70.6   | 21-Feb-20 | 153  |
| Ireland         | 4.3   | 115.6 | 860.4  | 28-Feb-20 | 4759 |
| Israel          | 0.8   | 108.6 | 1355.7 | 20-Feb-20 | 2837 |
| Italy           | 28.3  | 224.3 | 1249.5 | 29-Jan-20 | 2739 |
| Jamaica         | 0.1   | 2.1   | 18.2   | 09-Mar-20 | 296  |
| Japan           | 0.07  | 3.4   | 43.7   | 14-Jan-20 | 4233 |
| Jordan          | 0.06  | 3.5   | 166.6  | 01-Mar-20 | 224  |
| Kazakhstan      | 0.04  | 3.8   | 302.4  | 12-Mar-20 | 262  |
| Kenya           | 0.01  | 0.3   | 9.2    | 12-Mar-20 | 66   |
| Kyrgyzstan      | 0.06  | 4.1   | 147.4  | 17-Mar-20 | 73   |
| Latvia          | 0.1   | 30.6  | 1274.3 | 01-Mar-20 | 874  |
| Lebanon         | 0.3   | 8.4   | 158.3  | 20-Feb-20 | 662  |
| Lithuania       | 0.6   | 33.5  | 1106   | 27-Feb-20 | 988  |
| Luxembourg      | 7     | 474.5 | 4105.9 | 28-Feb-20 | 6271 |
| Malaysia        | 0.2   | 12.7  | 179.9  | 24-Jan-20 | 362  |
| Mauritania      | 0.02  | 0.1   | 1.4    | 12-Mar-20 | 47   |
| Mauritius       | 0.6   | 21.5  | 386.3  | 17-Mar-20 | 553  |
| Mexico          | 0.1   | 2.2   | 19.7   | 27-Feb-20 | 462  |
| Moldova         | 0.7   | 29.1  | 126.6  | 06-Mar-20 | 171  |
| Montenegro      | 0.3   | 39.5  | 320.7  | 16-Mar-20 | 532  |
| Morocco         | 0.2   | 3.4   | 15.2   | 01-Mar-20 | 171  |
| Myanmar         | 0.006 | 0.04  | 2.3    | 22-Mar-20 | 62   |
| Netherlands     | 13.1  | 119.9 | 505.3  | 26-Feb-20 | 4742 |
| New Zealand     | 0.02  | 25.1  | 972.1  | 27-Feb-20 | 3745 |
| Niger           | 0.05  | 1.1   | 17.3   | 18-Mar-20 | 23   |
| Nigeria         | 0.003 | 0.1   | 2.4    | 27-Feb-20 | 79   |
| North Macedonia | 1.4   | 29.6  | 299    | 25-Feb-20 | 328  |
| Norway          | 1.7   | 112.3 | 2100.9 | 25-Feb-20 | 7478 |
| Pakistan        | 0.03  | 1.9   | 19.1   | 25-Feb-20 | 40   |
| Panama          | 1.4   | 52.1  | 238.6  | 09-Mar-20 | 1041 |
| Paraguay        | 0.07  | 1.7   | 28.6   | 06-Mar-20 | 327  |
| Peru            | 0.3   | 9     | 65.4   | 05-Mar-20 | 316  |
| Philippines     | 0.2   | 3.5   | 22.4   | 29-Jan-20 | 129  |
| Poland          | 0.4   | 13.2  | 262.3  | 03-Mar-20 | 809  |

|                             |       |       |        |           |      |
|-----------------------------|-------|-------|--------|-----------|------|
| <b>Portugal</b>             | 3.7   | 128.9 | 1263   | 01-Mar-20 | 1801 |
| <b>Qatar</b>                | 0.2   | 76.7  | 1451.5 | 28-Feb-20 | 1827 |
| <b>Romania</b>              | 1.1   | 24.7  | 245.4  | 25-Feb-20 | 476  |
| <b>Russia</b>               | 0.04  | 5.9   | 623.7  | 30-Jan-20 | 469  |
| <b>San Marino</b>           | 100.2 | 822.3 | 1727   | 26-Feb-20 | 3013 |
| <b>Serbia</b>               | 0.7   | 30.5  | 123.2  | 05-Mar-20 | 494  |
| <b>Singapore</b>            | 0.1   | 27.7  | 1111   | 22-Jan-20 | 2462 |
| <b>Slovakia</b>             | 0.04  | 12.5  | 360.5  | 05-Mar-20 | 1178 |
| <b>Slovenia</b>             | 1.9   | 52.5  | 1475.2 | 03-Mar-20 | 1834 |
| <b>South Africa</b>         | 0.02  | 2.9   | 98     | 04-Mar-20 | 428  |
| <b>South Korea</b>          | 0.4   | 20.3  | 931    | 19-Jan-20 | 2043 |
| <b>Spain</b>                | 31.1  | 313.7 | 759.3  | 30-Jan-20 | 2390 |
| <b>Sri Lanka</b>            | 0.03  | 0.9   | 15.2   | 26-Jan-20 | 153  |
| <b>Sweden</b>               | 6.8   | 83.4  | 541.6  | 30-Jan-20 | 5711 |
| <b>Switzerland</b>          | 9.9   | 263.3 | 1986.7 | 24-Feb-20 | 9836 |
| <b>Thailand</b>             | 0.04  | 3.4   | 103    | 12-Jan-20 | 222  |
| <b>Togo</b>                 | 0.04  | 0.8   | 21.1   | 05-Mar-20 | 39   |
| <b>Trinidad and Tobago</b>  | 0.6   | 7.6   | 62.7   | 11-Mar-20 | 1064 |
| <b>Tunisia</b>              | 0.2   | 5.3   | 70     | 01-Mar-20 | 257  |
| <b>Turkey</b>               | 0.9   | 40.4  | 264.3  | 09-Mar-20 | 469  |
| <b>Ukraine</b>              | 0.1   | 3.8   | 16.5   | 02-Mar-20 | 141  |
| <b>United Arab Emirates</b> | 0.1   | 26.9  | 5451.7 | 28-Jan-20 | 1323 |
| <b>United Kingdom</b>       | 9.1   | 81.4  | 392.9  | 30-Jan-20 | 3958 |
| <b>United States</b>        | 3.9   | 122.1 | 636.7  | 20-Jan-20 | 9870 |
| <b>Uruguay</b>              | 0.2   | 12.2  | 164.9  | 12-Mar-20 | 1379 |
| <b>Zambia</b>               | 0.005 | 0.2   | 3.4    | 17-Mar-20 | 57   |
| <b>Zimbabwe</b>             | 0.01  | 0.07  | 2.5    | 19-Mar-20 | 94   |

212  
213  
214  
215  
216  
217  
218

**Table 4. Country level, multivariate linear regression of factors associated with COVID-19 mortality rate per 100 000 inhabitants. Sensitivity analysis limited to countries with epidemics starting prior to 15 March 2020.**

|                       | Coef. (95% Confidence Interval) | P-Value |
|-----------------------|---------------------------------|---------|
| N                     | 98                              |         |
| Tests/capita          | -0.036 (-0.005- -0.002)         | <0.001  |
| Cases/capita          | 0.093 (0.081- 0.104)            | <0.001  |
| Age of Epidemic       | -0.107 (-0.200- -0.014)         | 0.024   |
| Health Expenditure    | -0.0010 (-0.0017- -0.0002)      | 0.012   |
| Region                |                                 |         |
| Europe                | Ref                             |         |
| Africa                | -0.163 (-4.992-4.664)           | 0.946   |
| Americas              | 0.046 (-3.249-3.149)            | 0.977   |
| Eastern Mediterranean | 0.906 (-3.0188-4.830)           | 0.648   |
| South East Asia       | -3.037(-8.874-2.799)            | 0.304   |
| Western Pacific       | 0.240 (-5.091-4.651)            | 0.922   |

## References

1. Rubino S, Kelvin N, Bermejo-Martin JF, Kelvin D. As COVID-19 cases, deaths and fatality rates surge in Italy, underlying causes require investigation. *The Journal of Infection in Developing Countries*. 2020;14(03):265-7.
2. Anderson RM, Heesterbeek H, Klinkenberg D, Hollingsworth TD. How will country-based mitigation measures influence the course of the COVID-19 epidemic? *The Lancet*. 2020;395(10228):931-4.
3. Porcheddu R, Serra C, Kelvin D, Kelvin N, Rubino S. Similarity in Case Fatality Rates (CFR) of COVID-19/SARS-COV-2 in Italy and China. *J Infect Dev Ctries*. 2020;14(2):125-8. Epub 2020/03/09. doi: 10.3855/jidc.12600. PubMed PMID: 32146445.
4. Wu JT, Leung K, Bushman M, Kishore N, Niehus R, de Salazar PM, et al. Estimating clinical severity of COVID-19 from the transmission dynamics in Wuhan, China. *Nature Medicine*. 2020:1-5.
5. Lipsitch M, Swerdlow DL, Finelli L. Defining the Epidemiology of Covid-19 - Studies Needed. *N Engl J Med*. 2020;382(13):1194-6. Epub 2020/02/20. doi: 10.1056/NEJMp2002125. PubMed PMID: 32074416.
6. Ferguson N, Laydon D, Nedjati Gilani G, Imai N, Ainslie K, Baguelin M, et al. Report 9: Impact of non-pharmaceutical interventions (NPIs) to reduce COVID19 mortality and healthcare demand. 2020.
7. Mizumoto K, Kagaya K, Zarebski A, Chowell G. Estimating the asymptomatic proportion of coronavirus disease 2019 (COVID-19) cases on board the Diamond Princess cruise ship, Yokohama, Japan, 2020. *Euro Surveill*. 2020;25(10). Epub 2020/03/19. doi: 10.2807/1560-7917.ES.2020.25.10.2000180. PubMed PMID: 32183930; PubMed Central PMCID: PMC7078829.
8. Zhang Z, Yao W, Wang Y, Long C, Fu X. Wuhan and Hubei COVID-19 mortality analysis reveals the critical role of timely supply of medical resources. *J Infect*. 2020. Epub 2020/03/27. doi: 10.1016/j.jinf.2020.03.018. PubMed PMID: 32209384.
9. Russell TW, Hellewell J, Jarvis CI, van Zandvoort K, Abbott S, Ratnayake R, et al. Estimating the infection and case fatality ratio for coronavirus disease (COVID-19) using age-adjusted data from the outbreak on the Diamond Princess cruise ship, February 2020. *Eurosurveillance*. 2020;25(12):2000256.
